# Supplementary material
Source: publisher figshare collection journal article supplement (https://geolsoc.figshare.com/ndownloader/files/13303367)
Supplement: Supplementary file 1 [file 13303367]

## Sheet: Sheet1
Optical Maturation Analysis: Vitrinite Reflectance and Spore Colour Index
Well	Depth (m TVD)	Formation	Mean Rm	Std. Dev.	SCI		Well	Depth (m TVD)	Formation	Mean Rm	Std. Dev.	SCI
A	490	UT II	0.29	0.18	2.5		C	480	UT II	0.27	0.05
A	555	UT II	0.24	0.11	2.75		C	555	UT II	0.2	0.2	2.25
A	675	UHy	0.56	0.14	2		C	660	UT I	0.48	0.11	2
A	760	UHy	0.57	0.14	2		C	710	UT I	0.44	0.11
A	840	UHy	0.61	0.12	2.25		C	760	UT I	0.63	0.15	3
A	920	UHy	0.6	0.13	2		C	785	UHy			2
A	1000	UHy	0.47	0.12	2.5		C	815	UHy	0.6	0.17	2.25
A	1080	UHy	0.55	0.1	2.25		C	895	UHy	0.57	0.13	1.25
A	1100	UHy	0.55	0.1	2.5		C	970	UHy	0.55	0.12	2.25
A	1165	LHy	0.56	0.1	2.5		C	1045	UHy	0.74	0.17	2
A	1175	LHy	0.64	0.11	2.25		C	1125	UHy	0.67	0.17	3
A	1250	Cer	0.57	0.08	2.5		C	1210	UHy	0.53	0.11	3
A	1260	Cer	0.46	0.15	4		C	1260	UHy			2.75
A	1330	BN	0.63	0.12	2.5		C	1285	LHy	0.6	0.13	2.75
A	1335	BN	0.57	0.1	2.5		C	1325	LHy			2.5
A	1400	BN			2.5		C	1355	LHy	0.54	0.11	3
A	1420	BN	0.63	0.09	3.75		C	1375	LHy			2.75
A	1435	CyM&ME	0.57	0.14	2.5		C	1430	LHy	0.61	0.12	3.75
A	1460	CyM&ME	0.59	0.12	2.25		C	1460	LHy			2.75
A	1550	CyM&ME	0.52	0.1	3		C	1495	LHy			2.75
A	1645	RpC	0.44	0.12	2.75		C	1525	LHy	0.62	0.14	2.75
							C	1555	Cor			2.5
Well	Depth (m TVD)	Formation	Mean Rm	Std. Dev.	SCI		C	1565	Cor			2.25
B	545	UT II	0.37	0.06	2.25		C	1575	Cor			2.75
B	630	UT I	0.29	0.04	2.75		C	1600	Cor			2.5
B	740	UT I	0.31	0.04	3		C	1615	Cor	0.68	0.12	2.5
B	840	UHy	0.42	0.08	2.5		C	1635	Cor			2.25
B	920	UHy	0.53	0.09	2		C	1650	Cor			2.75
B	995	UHy	0.49	0.08	2.5		C	1665	Cor			2.25
B	1065	UHy	0.53	0.09	2		C	1685	Cer	0.62	0.13	2.5
B	1125	UHy	0.45	0.06	2.75		C	1730	Cer			2.75
B	1155	UHy			2		C	1750	Cer			2.75
B	1170	UHy			2.75		C	1780	Cer	0.65	0.09	2.5
B	1180	UHy	0.46	0.06	2.5		C	1865	BN	0.55	0.12	2.5
B	1190	UHy			2.25		C	1955	CyM&ME	0.54	0.13	2.75
B	1200	LHy			2.25		C	2035	CyM&ME	0.37	0.11	3
B	1215	LHy			2.25		C	2110	RpC			3.25
B	1225	LHy			3.25		C	2120	RpC			2.75
B	1230	LHy			3		C	2130	RpC	0.53	0.11	3
B	1250	LHy	0.46	0.05	2.25		C	2140	RpC			2.75
B	1265	LHy			2.25		C	2155	RpC			2.5
B	1285	LHy			2.5		C	2165	PE			2.5
B	1310	LHy	0.64	0.13	2.25		C	2175	PE			2.75
B	1320	LHy			1.75		C	2250	PE			3
B	1340	LHy			2		C	2255	PE	0.55	0.16	2.5
B	1350	LHy			2.75		C	2260	PE			3.25
B	1365	LHy	0.61	0.1	2		C	2310	PE			2.75
B	1375	CyM&ME			2		C	2340	PE	0.32	0.04	2
B	1405	CyM&ME	0.37	0.14	2		C	2345	PE			2.75
B	1480	CyM&ME	0.4	0.14	2.75		C	2355	PE			1.75
B	1490	RpC			2.75		C	2360	PE			1.75
B	1495	RpC			2.25
B	1505	RpC			2.5
B	1525	RpC			2
B	1535	PE			2.25
B	1545	PE			2.25
B	1555	PE			2.5
B	1570	PE	0.51	0.11	2.5
